# Supplementary material for: Influence of Nitric Oxide generated through microwave plasma on L6 skeletal muscle cell myogenesis via oxidative signaling pathways
Source: Sci Rep. 2017 Apr 3;7:542. doi: 10.1038/s41598-017-00154-3 (PMC5427886; doi:10.1038/s41598-017-00154-3)
Supplement: Supplementary file 1 — Supporting information [file 41598_2017_154_MOESM1_ESM.pdf]

## Supporting information

### Influence of Nitric Oxide generated through microwave plasma on L6 skeletal muscle cell differentiation via oxidative signaling pathways

Naresh Kumar<sup>#</sup>, Priyanka Shaw<sup>#</sup>, Han Sup Uhm<sup>\*</sup>, Eun Ha Choi<sup>\*</sup> and Pankaj Attri<sup>\*</sup>

*Plasma Bioscience Research Center/ Department of Electrical and Biological Physics,  
Kwangwoon University, 20 Kwangwon-Ro, Nowon-Gu, Seoul 139-701, Korea*

#### Titles and legends to figures

**Figure S1.** Immunofluorescence actin, tublin, and nucleus images of L6 cells on 2nd days after exposure with 3 min of 200 sccm of oxygen (control without exposure is taken as 0 min)

**Figure S2.** Immunofluorescence actin, tublin, and nucleus images of L6 cells on 4<sup>th</sup> days after exposure with 3 min of 200 sccm of oxygen (control without exposure is taken as 0 min)

**Figure S3.** Immunofluorescence actin, tublin, and nucleus images of L6 cells on 8<sup>th</sup> days after exposure with 3 min of 200 sccm of oxygen (control without exposure is taken as 0 min)

**Figure S4.** NOS activates and gene expression analysis. (a) NOS activates after exposure with NO (200 of O<sub>2</sub> flow rate) for 3 min and in the presence of 50  $\mu$ M of GSNO on day 2, day 4, and day 8, (b) Myogenic differentiation regulated mRNA expression such as myoD, MHC, and myogenin gene expression analysis after exposure with 50  $\mu$ M GSNO on day 8. The relative value of mRNA expression of these genes was measured by real-time RT-PCR.  $\beta$ -actin was used as a reference gene. All values are expressed as  $\pm$  SD in triplicate.

**Figure S5.** Western blot analysis of the MHC, Erks, APMK and Erks & AMPK phosphorylation on 8th day after exposure with NO (200 of O<sub>2</sub> flow rate) for 3 min.  $\beta$ -tublin was used as the loading control.

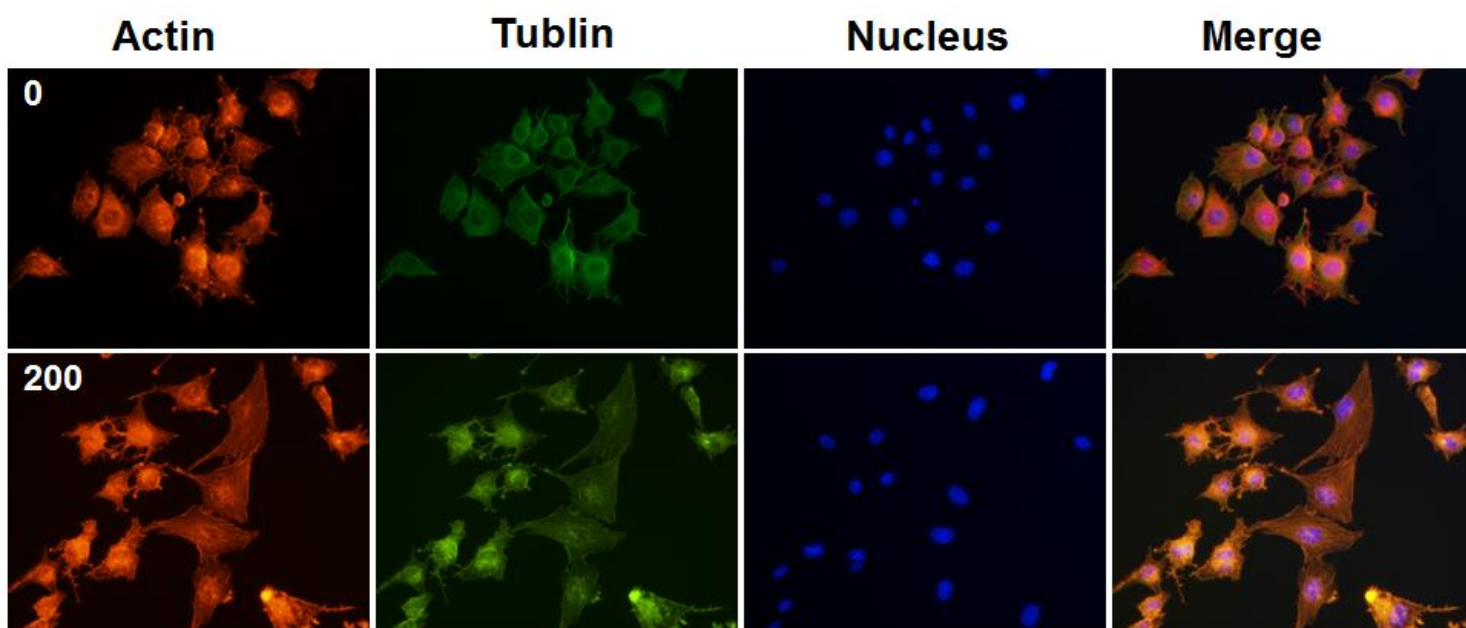

Figure S1

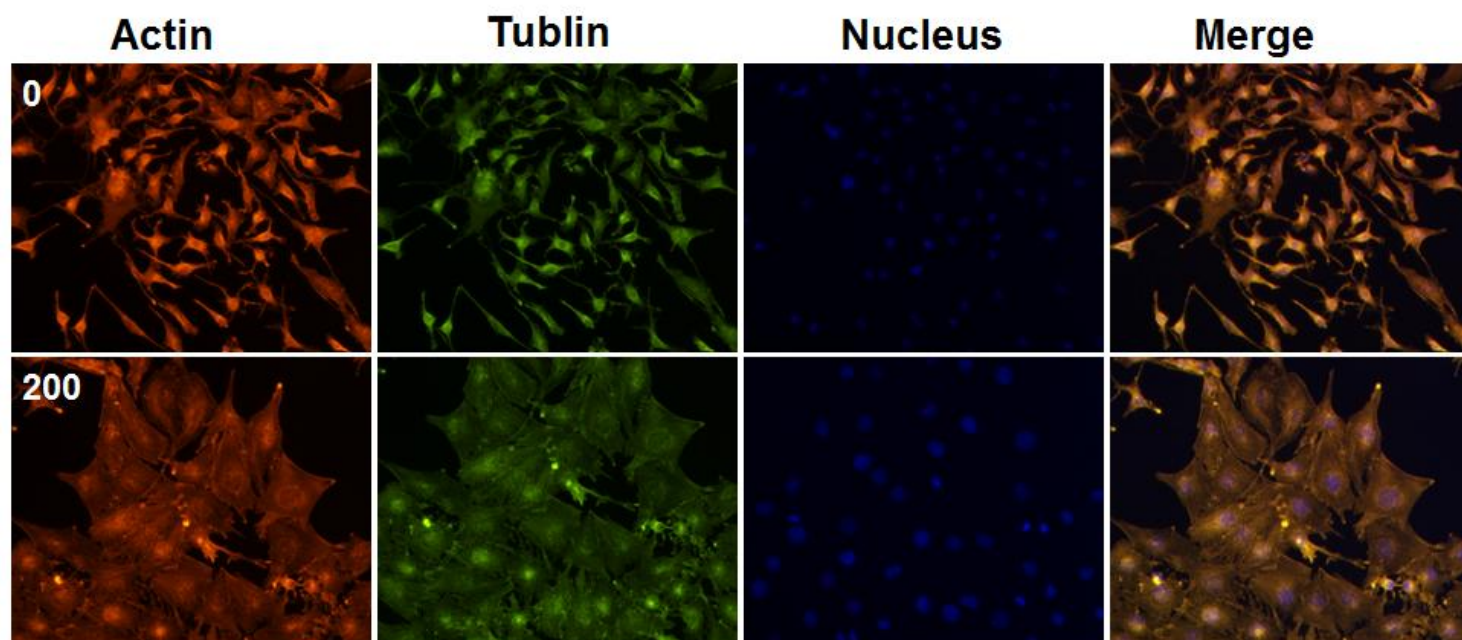

Figure S2

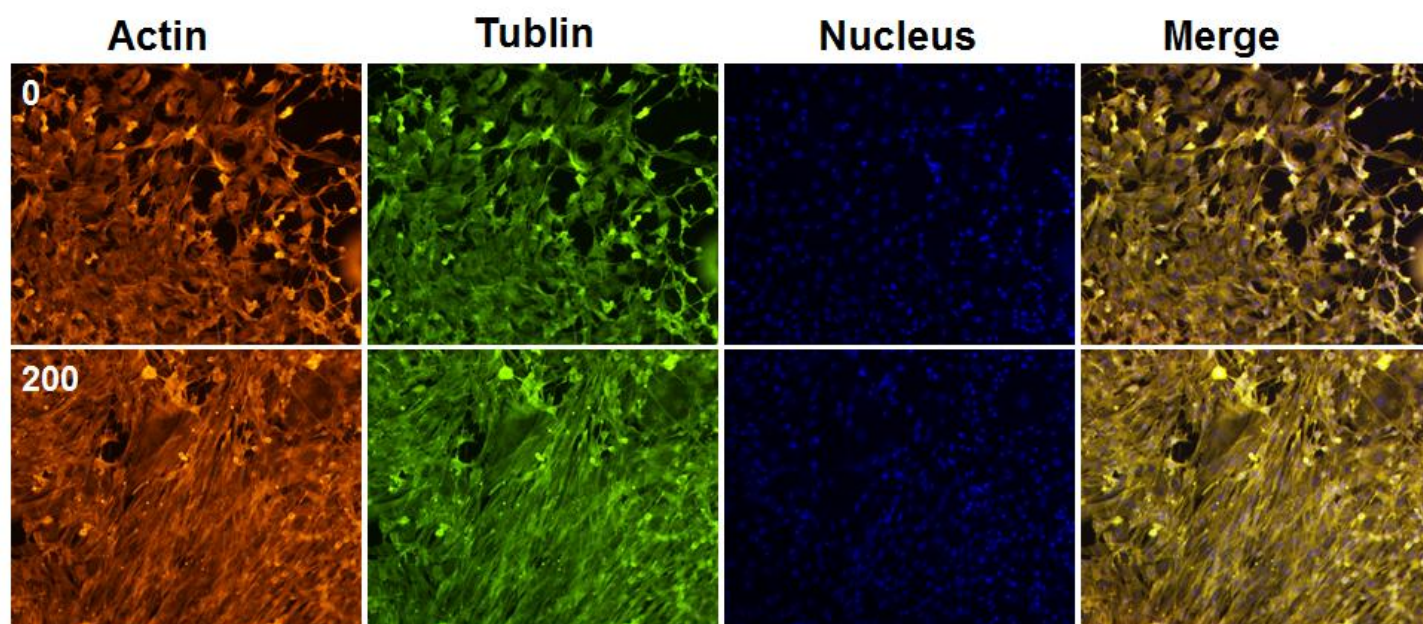

**Figure S3**

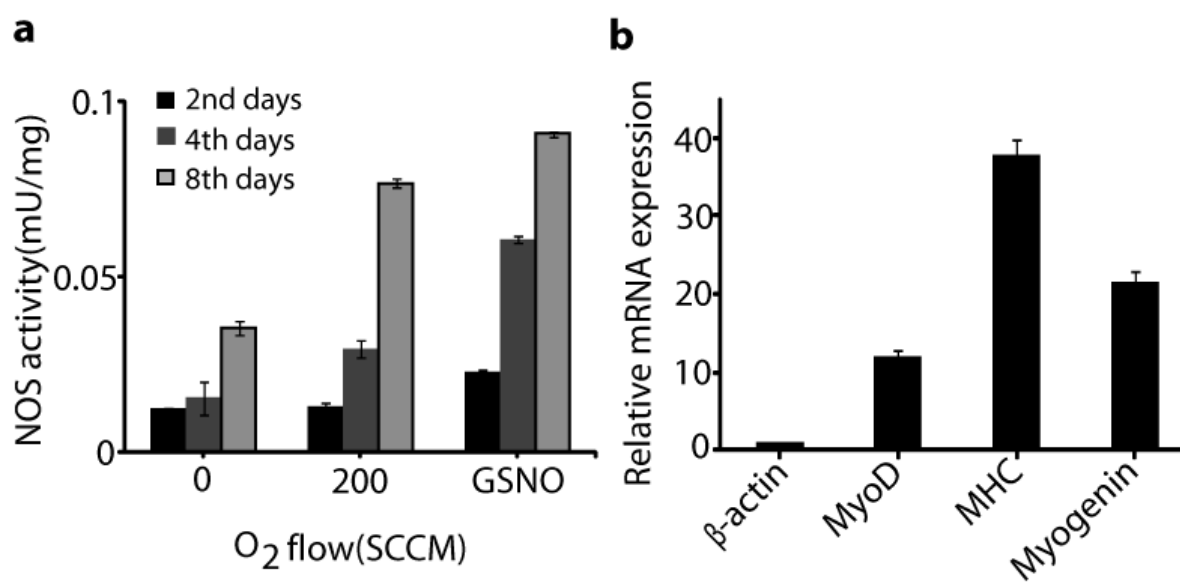

**Figure S4**

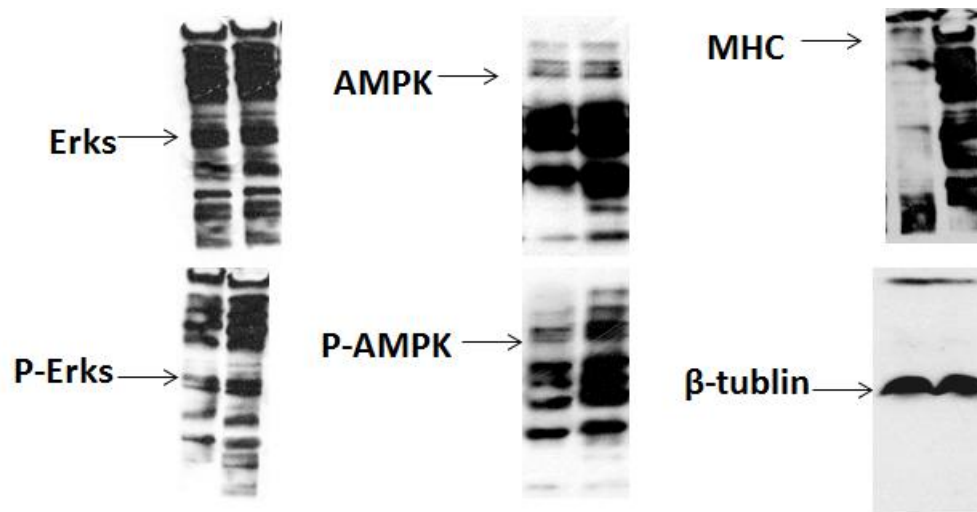

**Figure S5**
